1 ***Toxoplasma* does not secrete the GRA16 and GRA24 effectors beyond**  
2 **the parasitophorous vacuole membrane of tissue cysts**

3 **Shruthi Krishnamurthy<sup>1</sup>, Jeroen PJ Saeij<sup>1\*</sup>**

4 <sup>1</sup> Department of Pathology, Microbiology and Immunology, School of Veterinary Medicine,  
5 University of California Davis, One Shields Ave., Davis, 95616, California, USA

6 **\* Correspondence:**  
7 Corresponding Author  
8 [jsaeij@ucdavis.edu](mailto:jsaeij@ucdavis.edu)

9 **Keywords:** *Toxoplasma gondii*<sup>1</sup>, secreted effectors<sup>2</sup>, tissue cyst wall<sup>3</sup>, tetracycline inducible  
10 expression<sup>4</sup>, GRA16<sup>5</sup>, GRA24<sup>6</sup>.

11 **Abstract**

12 After invasion, *Toxoplasma* resides in a parasitophorous vacuole (PV) that is surrounded by the PV  
13 membrane (PVM). Once inside the PV, tachyzoites secrete dense granule proteins (GRAs) of which  
14 some, such as GRA16 and GRA24, are transported beyond the PVM likely *via* a putative translocon.  
15 However, once tachyzoites convert into bradyzoites within cysts, it is not known if secreted GRAs  
16 can traffic beyond the cyst wall membrane. We used the tetracycline inducible system to drive  
17 expression of HA epitope tagged GRA16 and GRA24 after inducing stage conversion and show that  
18 these proteins are not secreted beyond the cyst wall membrane.

19

20 **1 Introduction**

21 *Toxoplasma gondii*, which belongs to the phylum Apicomplexa, is an obligate intracellular  
22 parasite that can cause disease in immuno-compromised patients and fetuses (Montoya and  
23 Liesenfeld, 2004; Weiss and Dubey, 2009). It is the causative agent of toxoplasmosis, the 2<sup>nd</sup> most  
24 common cause of food-borne illness in the USA (Jones and Dubey, 2012). Infectious tissue cysts are  
25 present in brain and muscles of many warm-blooded chronically infected hosts (Kim and Weiss,  
26 2004). Infected cats, which are the definitive hosts, shed infectious oocysts in their feces  
27 contaminating food and water sources. Infection is initiated by ingestion of either tissue cysts  
28 containing the bradyzoite life-cycle stage or oocysts (Dubey, 1998). Upon stage conversion into  
29 tachyzoites and invasion of a host cell, *Toxoplasma* forms a parasitophorous vacuole (PV) that is  
30 surrounded by the PV membrane (PVM)(Black and Boothroyd, 2000). During invasion, *Toxoplasma*  
31 secretes effector proteins from rhoptries (ROPs), which mediate invasion, inhibition of host  
32 restriction factors, and modulation of host signaling pathways (Dubremetz, 2007; Boothroyd and  
33 Dubremetz, 2008). Once inside the PV, proteins from the dense granule secretory organelles (GRAs)  
34 are secreted onto, and beyond the PVM into the host cell cytoplasm (Hakimi and Bougdour, 2015).  
35 Three putative translocon proteins: Myc-regulation 1 (MYR1) along with MYR2 and MYR3  
36 determine transport of GRA16 and GRA24 across the PVM into the host cell cytoplasm after which  
37 they traffic to the host cell nucleus (Franco et al., 2016; Marino et al., 2018). In addition to these  
38 putative translocon proteins, an aspartyl protease, ASP5 cleaves many secreted GRA proteins at a  
39 characteristic RRLxx motif also known as the *Toxoplasma* export element (TEXEL) motif which is

40 important for their localization and function (Coffey et al., 2015; Hammoudi et al., 2015). Most of  
41 these effectors that have been characterized are from the non-orally infectious tachyzoite stage. It is  
42 unclear if bradyzoites within tissue cysts, akin to tachyzoites within the PV, can secrete GRAs  
43 beyond the PVM as the cyst wall is built on the inside of the PVM and presents a potential barrier for  
44 GRA secretion into the host cell.

45 GRA16, GRA24, GRA28 and IST (*T. gondii* inhibitor of STAT1 transcriptional activity) are  
46 secreted by tachyzoites beyond the PVM and traffic to the host nucleus (Bougdoor et al., 2013; Braun  
47 et al., 2013; Gay et al., 2016; Nadipuram et al., 2016; Olias et al., 2016) where they modulate host  
48 signaling pathways important for parasite fitness. In this brief report we use the tetracycline inducible  
49 system to induce the expression of epitope tagged GRA16 and GRA24 after *in vitro* stage  
50 conversion. We observed that ATc induced *GRA16*-HA and *GRA24*-HA do not traffic to host cell  
51 nucleus. Instead, they accumulate within the *in vitro* tissue cysts.

52

## 53 **2 Materials and Methods**

### 54 **2.1 Host cells and parasite strain**

55 Human foreskin fibroblasts (HFFs) were used as host cells and were cultured under standard  
56 conditions using Dulbecco Modified Eagle Medium (DMEM) with 10% fetal bovine serum (FBS)  
57 (Rosowski et al., 2011). We chose GT1 parasites expressing Tet-R (Etheridge et al., 2014a), a type I  
58 strain that is capable of forming cysts during *in vitro* stage conversion (Lindsay et al., 1991; Fux et  
59 al., 2007) induced by pH 8-8.2+low CO<sub>2</sub> (Skariah et al., 2010).

### 60 **2.2 Plasmid construction**

61 Using Gibson assembly (Gibson et al., 2009), we constructed Tet-On plasmids with a phleomycin  
62 resistance cassette to express GRA16-HA and GRA24-HA. The pTeton vector backbone was  
63 amplified with the following primers which was used to construct both the pTetONGRA16-HA  
64 SRS22A3'UTR as well as the pTetONGRA24-HA SRS22A3UTR constructs:

65 vector TetON for-GCATCCACTAGTGCTCTTCAAGGTTTTACATCCGTTGCCT

66 Vector TetON rev-AATTGCGCCATTTTGACGGTGACGAAGCCACCTGAGGAAGAC

67 The following primers were used to amplify the pieces for pTetONGRA16-HA SRS22A3'UTR Gibson  
68 assembly:

69 Vector GRA16 for-ACCGTCAAAATGGCGCAATTATGTATCGAAACCACTCAGGGATAC

70 SRS22UTRGRA16 rev-AATGACAGGTTCAAGCATAATCGGGAACGTCGTATG

71 GRA16HA SRS22A for-TTATGCTTGAACCTGTCATTTACCTCCAGTAAACATG

72 SRS22Avector rev-TGAAGAGCACTAGTGGATGCGTTCTAGTGCTGTACGAAAAGCAAC

73 The following primers were used to amplify the pieces for pTetONGRA24-HA SRS22A3'UTR Gibson  
74 assembly:

75 vectorGRA24 for -ACCGTCAAAATGGCGCAATTATGCTCCAGATGGCACGATATACCG

76 SRS22AUTRGRA24HA rev-AATGACAGGTTTAAAGCATAATCGGGAACGTCGTATG

77 GRA24HASRS22A For-TTATGCTTAAACCTGTCATTTACCTCCAGTAAACATG

### 78 **2.3 Parasite transfection and selection**

79 The pTetOn vectors containing GRA16-HA and GRA24-HA were linearized using AseI restriction  
80 enzyme. The linearized plasmids (50µg) were electroporated into 5x10<sup>7</sup> GT1tetR parasites using the  
81 protocol described in (Gold et al., 2015). After lysis of parasites from host cells, they were selected

82 twice with 50 $\mu$ g/ml phleomycin (Ble) and maintained in 5 $\mu$ g/ml Ble (Krishnamurthy et al., 2016)  
83 until they were cloned out by limiting dilution.

84

### 85 **3 Results**

86 To test if GRAs are secreted beyond the tissue cyst wall membrane, we utilized the Tet-inducible  
87 system (Etheridge et al., 2014a) to express an HA-tagged copy of GRA16 or GRA24 under the Tet  
88 operator (Tet-O) in parasites expressing the tetracycline repressor (Tet-R). We could not just use  
89 *GRA16*-HA or *GRA24*-HA expressed from the endogenous promoter because if we see these proteins  
90 in the host nucleus we would not know if they were secreted beyond the PVM before the cyst wall  
91 was made (as tachyzoites) or after the cyst wall was made (as bradyzoites). In the absence of  
92 anhydrotetracycline (ATc), the Tet-R binds to Tet-O and represses the transcription of either *GRA16*-  
93 HA or *GRA24*-HA under the RPS13 promoter (Etheridge et al., 2014b; Wang et al., 2016). ATc  
94 binds TetR and relieves repression of transcription which allows for the expression of HA-tagged  
95 GRA16 or GRA24. Since ATc is smaller than the size-exclusion limit of the cyst wall (Lemgruber et  
96 al., 2011), we decided to use this system to answer our question.

97 To check if our constructs were able to stably express functional GRA16 and GRA24, we first  
98 transfected them into the RH parasite strain and observed nuclear localization of these proteins (data  
99 not shown). After transfection of the GT1 Tet-R expressing strain with the Tet-inducible GRA16-HA  
100 or GRA24-HA construct and subsequent selection with phleomycin for stable integration, we show  
101 by IFA that in tachyzoites GRA16-HA and GRA24-HA are only expressed in the presence of ATc  
102 (fig. 1a).

103 A single parasite clone that expressed GRA16-HA or GRA24-HA only in the presence of  
104 ATc was chosen for induction of stage differentiation *in vitro* in human foreskin fibroblast (HFFs).  
105 The media was switched from DMEM with 10% FBS to tricine-buffered RPMI media with pH 8.0  
106 and put in an incubator with low CO<sub>2</sub> after 24 hours of infection (MOI=0.1) to induce tachyzoite to  
107 bradyzoite stage conversion. Five days post-switching, 2 $\mu$ M of ATc was added to the cultures to  
108 induce the expression of GRA16-HA and GRA24-HA since we observed that at least 50% of the  
109 parasites had converted to cysts by staining the cyst wall with DBA-lectin (Boothroyd et al., 1997)  
110 (data not shown). The parasites were fixed 48 hours following addition of ATc to allow for sufficient  
111 expression of GRA16-HA and GRA24-HA. We performed an indirect immunofluorescence assay  
112 (IFA) to determine the localization of GRA16 and GRA24 using anti-HA antibody as well as DBA-  
113 lectin to detect the cyst wall. We show that in host cells containing tissue cysts, GRA16-HA and  
114 GRA24-HA were not detected in the host cell nucleus or beyond the tissue cyst wall membrane and  
115 that instead they accumulated underneath the cyst wall. Almost 100% of vacuoles we observed were  
116 DBA positive. We decided to observe HFFs only infected with one parasite and therefore containing  
117 only one cyst as differences in the timing of conversion could affect the localization of GRA16 and  
118 GRA24. Out of 142 (59 for GRA16-HA and 83 for GRA24-HA from four biological replicates)  
119 images of singly infected host cells containing DBA positive cysts, both GRA16 and GRA24 were  
120 expressed exclusively beneath the cyst wall only in the presence of ATc (Figs 1b and 2a). We  
121 observed GRA24 localized to the host cell nucleus only in multiple infected cells containing  
122 tachyzoites, along with *in vitro* cysts (Fig. 2b). Thus, our results show that GRA16 and GRA24 are  
123 not secreted beyond the tissue cyst membrane into the host cell.

124

### 125 **4 Discussion**

126 We show here that GT1 parasites are able to form DBA lectin positive *in vitro* cysts. We also  
127 show for the first time that ATc is able to cross the cyst wall *in vitro*. Even though bradyzoites within  
128 tissue cysts are not as metabolically active compared to tachyzoites, it is becoming clear that they are  
129 also not in a dormant state (Sinai et al., 2016). However, we observed that bradyzoites do not secrete  
130 GRA16 and GRA24 beyond the *in vitro* cyst wall membrane. These proteins accumulated within the  
131 cyst wall suggesting that their role in the host cell nucleus is not required at this stage. Possibly  
132 bradyzoites require these proteins during natural oral infections after excystation from tissue cysts to  
133 establish infection in gut epithelial cells of the host. Not secreting parasite proteins beyond the cyst  
134 wall might help *Toxoplasma* to remain invisible and undetected by the host immune response during  
135 the chronic phase of infection. Another possibility may be that the translocon proteins MYR1/2/3 or  
136 ASP5 are not sufficiently expressed at this stage to effectively mediate transport of secreted GRAs  
137 beyond the cyst wall membrane. Even though all the MYRs and ASP5 are expressed in tachyzoites,  
138 sporozoites and bradyzoites, their expression is significantly lower in bradyzoites (Marino et al.,  
139 2018). However, even if MYR1-3 and ASP5 are expressed, our data indicate that the cyst wall seems  
140 to act as a barrier as ATc- induced GRA16 and GRA24 accumulated beneath the wall (Fig. 1 and 2).  
141

## 142 **5 Abbreviations**

143 Tet-on: tetracycline inducible system; TetR: tetracycline repressor protein; ATc: anhydrotetracycline;  
144 HA: hemagglutinin epitope tag; YFP: yellow fluorescent protein; Ble: phleomycin; HFF: human  
145 foreskin fibroblast; DBA lectin: dolichos biflorus agglutinin; IFA: indirect immunofluorescence;  
146 GRA: dense granule proteins; ROP: rhoptry proteins; IST: *T. gondii* inhibitor of STAT1  
147 transcriptional activity; PV: parasitophorous vacuole; PVM: PV membrane.

148

## 149 **6 Conflict of Interest**

150 The authors declare that the research was conducted in the absence of any commercial or financial  
151 relationships that could be construed as a potential conflict of interest.

## 152 **7 Author Contributions**

153 SK generated all the data. SK and JS wrote and edited the manuscript.

## 154 **8 Funding**

155 This research was funded by NIH-2R01AI080621-06A1.

## 156 **9 Acknowledgments**

157 We thank all the members of the Saeij lab for their feedback on this manuscript. We also thank Dr.  
158 Ronald D. Etheridge for providing us with GT1-TetR parasites.

## 159 **10 References**

160 Black, M.W., and Boothroyd, J.C. (2000). Lytic Cycle of *Toxoplasma gondii* *Microbiol Mol Biol Rev*  
161 64(3), 607–623.

- 162 Boothroyd, J.C., Black, M., Bonnefoy, S., Hehl, A., Knoll, L.N., Manger, I.D., et al. (1997). Genetic  
163 and biochemical analysis of development in *Toxoplasma gondii*. *Phil.Trans. R. Soc. Lond. B*  
164 353, 1347-1354.
- 165 Boothroyd, J.C., and Dubremetz, J.F. (2008). Kiss and spit: the dual roles of *Toxoplasma* rhoptries.  
166 *Nat Rev Microbiol* 6(1), 79-88. doi: 10.1038/nrmicro1800.
- 167 Bougdour, A., Durandau, E., Brenier-Pinchart, M.P., Ortet, P., Barakat, M., Kieffer, S., et al. (2013).  
168 Host cell subversion by *Toxoplasma* GRA16, an exported dense granule protein that targets  
169 the host cell nucleus and alters gene expression. *Cell Host Microbe* 13(4), 489-500. doi:  
170 10.1016/j.chom.2013.03.002.
- 171 Braun, L., Brenier-Pinchart, M.P., Yogavel, M., Curt-Varesano, A., Curt-Bertini, R.L., Hussain, T.,  
172 et al. (2013). A *Toxoplasma* dense granule protein, GRA24, modulates the early immune  
173 response to infection by promoting a direct and sustained host p38 MAPK activation. *J Exp*  
174 *Med* 210(10), 2071-2086. doi: 10.1084/jem.20130103.
- 175 Coffey, M.J., Sleebs, B.E., Uboldi, A.D., Garnham, A., Franco, M., Marino, N.D., et al. (2015). An  
176 aspartyl protease defines a novel pathway for export of *Toxoplasma* proteins into the host  
177 cell. *Elife* 4. doi: 10.7554/eLife.10809.
- 178 Dubey, J.P. (1998). Advances in the life cycle of *Toxoplasma gondii*. *Int J Parasitol* 28, 1019-1024.
- 179 Dubremetz, J.F. (2007). Rhoptries are major players in *Toxoplasma gondii* invasion and host cell  
180 interaction. *Cell Microbiol* 9(4), 841-848. doi: 10.1111/j.1462-5822.2007.00909.x.
- 181 Etheridge, R.D., Alaganan, A., Tang, K., Lou, H.J., Turk, B.E., and Sibley, L.D. (2014a). The  
182 *Toxoplasma* pseudokinase ROP5 forms complexes with ROP18 and ROP17 kinases that  
183 synergize to control acute virulence in mice. *Cell Host Microbe* 15(5), 537-550. doi:  
184 10.1016/j.chom.2014.04.002.
- 185 Franco, M., Panas, M.W., Marino, N.D., Lee, M.C., Buchholz, K.R., Kelly, F.D., et al. (2016). A  
186 Novel Secreted Protein, MYR1, Is Central to *Toxoplasma*'s Manipulation of Host Cells. *MBio*  
187 7(1), e02231-02215. doi: 10.1128/mBio.02231-15.
- 188 Fux, B., Nawas, J., Khan, A., Gill, D.B., Su, C., and Sibley, L.D. (2007). *Toxoplasma gondii* strains  
189 defective in oral transmission are also defective in developmental stage differentiation. *Infect*  
190 *Immun* 75(5), 2580-2590. doi: 10.1128/IAI.00085-07.
- 191 Gay, G., Braun, L., Brenier-Pinchart, M.P., Vollaire, J., Jossierand, V., Bertini, R.L., et al. (2016).  
192 *Toxoplasma gondii* TgIST co-opts host chromatin repressors dampening STAT1-dependent  
193 gene regulation and IFN-gamma-mediated host defenses. *J Exp Med* 213(9), 1779-1798. doi:  
194 10.1084/jem.20160340.
- 195 Gibson, D.G., Young, L., Chuang, R.Y., Venter, J.C., Hutchison, C.A., 3rd, and Smith, H.O. (2009).  
196 Enzymatic assembly of DNA molecules up to several hundred kilobases. *Nat Methods* 6(5),  
197 343-345. doi: 10.1038/nmeth.1318.
- 198 Gold, D.A., Kaplan, A.D., Lis, A., Bett, G.C., Rosowski, E.E., Cirelli, K.M., et al. (2015). The  
199 *Toxoplasma* Dense Granule Proteins GRA17 and GRA23 Mediate the Movement of Small  
200 Molecules between the Host and the Parasitophorous Vacuole. *Cell Host Microbe* 17(5), 642-  
201 652. doi: 10.1016/j.chom.2015.04.003.
- 202 Hakimi, M.A., and Bougdour, A. (2015). *Toxoplasma*'s ways of manipulating the host transcriptome  
203 via secreted effectors. *Curr Opin Microbiol* 26, 24-31. doi: 10.1016/j.mib.2015.04.003.

- 204 Hammoudi, P.M., Jacot, D., Mueller, C., Di Cristina, M., Dogga, S.K., Marq, J.B., et al. (2015).  
205 Fundamental Roles of the Golgi-Associated Toxoplasma Aspartyl Protease, ASP5, at the  
206 Host-Parasite Interface. *PLoS Pathog* 11(10), e1005211. doi: 10.1371/journal.ppat.1005211.
- 207 Jones, J.L., and Dubey, J.P. (2012). Foodborne toxoplasmosis. *Clin Infect Dis* 55(6), 845-851. doi:  
208 10.1093/cid/cis508.
- 209 Kim, K., and Weiss, L.M. (2004). *Toxoplasma gondii*: the model Apicomplexan. *Int J Parasitol*  
210 34(3). doi: 10.1016/j.ijpara.2003.12.009.
- 211 Krishnamurthy, S., Deng, B., Del Rio, R., Buchholz, K.R., Treeck, M., Urban, S., et al. (2016). Not a  
212 Simple Tether: Binding of *Toxoplasma gondii* AMA1 to RON2 during Invasion Protects  
213 AMA1 from Rhomboid-Mediated Cleavage and Leads to Dephosphorylation of Its Cytosolic  
214 Tail. *MBio* 7(5). doi: 10.1128/mBio.00754-16.
- 215 Lemgruber, L., Lupetti, P., Martins-Duarte, E.S., De Souza, W., and Vommaro, R.C. (2011). The  
216 organization of the wall filaments and characterization of the matrix structures of *Toxoplasma*  
217 *gondii* cyst form. *Cell Microbiol* 13(12), 1920-1932. doi: 10.1111/j.1462-5822.2011.01681.x.
- 218 Lindsay, D.S., Dubey, J.P., Blagburn, B.L., and Toivio-Kinnucan, M. (1991). Examination of Tissue  
219 Cyst Formation by *Toxoplasma gondii* in Cell Cultures Using Bradyzoites, Tachyzoites, and  
220 Sporozoites. *J Parasitol* 77(1), 126-132.
- 221 Marino, N.D., Panas, M.W., Franco, M., Theisen, T.C., Naor, A., Rastogi, S., et al. (2018).  
222 Identification of a novel protein complex essential for effector translocation across the  
223 parasitophorous vacuole membrane of *Toxoplasma gondii*. *PLoS Pathog* 14(1), e1006828.  
224 doi: 10.1371/journal.ppat.1006828.
- 225 Montoya, J.G., and Liesenfeld, O. (2004). Toxoplasmosis. *The Lancet* 363(9425), 1965-1976. doi:  
226 10.1016/s0140-6736(04)16412-x.
- 227 Nadipuram, S.M., Kim, E.W., Vashisht, A.A., Lin, A.H., Bell, H.N., Coppens, I., et al. (2016). In  
228 Vivo Biotinylation of the *Toxoplasma* Parasitophorous Vacuole Reveals Novel Dense  
229 Granule Proteins Important for Parasite Growth and Pathogenesis. *MBio* 7(4). doi:  
230 10.1128/mBio.00808-16.
- 231 Olias, P., Etheridge, R.D., Zhang, Y., Holtzman, M.J., and Sibley, L.D. (2016). *Toxoplasma* Effector  
232 Recruits the Mi-2/NuRD Complex to Repress STAT1 Transcription and Block IFN-gamma-  
233 Dependent Gene Expression. *Cell Host Microbe* 20(1), 72-82. doi:  
234 10.1016/j.chom.2016.06.006.
- 235 Rosowski, E.E., Lu, D., Julien, L., Rodda, L., Gaiser, R.A., Jensen, K.D., et al. (2011). Strain-  
236 specific activation of the NF-kappaB pathway by GRA15, a novel *Toxoplasma gondii* dense  
237 granule protein. *J Exp Med* 208(1), 195-212. doi: 10.1084/jem.20100717.
- 238 Sinai, A.P., Watts, E.A., Dhara, A., Murphy, R.D., Gentry, M.S., and Patwardhan, A. (2016).  
239 Reexamining Chronic *Toxoplasma gondii* Infection: Surprising Activity for a "Dormant"  
240 Parasite. *Curr Clin Microbiol Rep* 3(4), 175-185. doi: 10.1007/s40588-016-0045-3.
- 241 Skariah, S., McIntyre, M.K., and Mordue, D.G. (2010). *Toxoplasma gondii*: determinants of  
242 tachyzoite to bradyzoite conversion. *Parasitol Res* 107(2), 253-260. doi: 10.1007/s00436-  
243 010-1899-6.
- 244 Wang, J.L., Huang, S.Y., Behnke, M.S., Chen, K., Shen, B., and Zhu, X.Q. (2016). The Past, Present,  
245 and Future of Genetic Manipulation in *Toxoplasma gondii*. *Trends Parasitol* 32(7), 542-553.  
246 doi: 10.1016/j.pt.2016.04.013.

247 Weiss, L.M., and Dubey, J.P. (2009). Toxoplasmosis: A history of clinical observations. *Int J*  
248 *Parasitol* 39(8), 895-901. doi: 10.1016/j.ijpara.2009.02.004.

## 249 **11 Figure Legends**

250 **Figure 1a. GT1- TetR parasites express GRA16-HA and GRA24-HA only in the presence of**  
251 **ATc.** Coverslips with a monolayer of HFFs were infected in the presence or absence of 2 $\mu$ M ATC  
252 with GT1-TetR parasites or single clones of parasites expressing GRA16-HA and GRA24-HA under  
253 the RPS13 promoter downstream of a Tet-O7 operator. The coverslips were fixed 16 hours post  
254 infection with 3% formaldehyde and processed for IFA using rabbit anti-HA primary (Roche)  
255 antibody followed by goat anti-rabbit Alexa-555 secondary antibody and Hoechst (invitrogen). Tet-R  
256 is YFP tagged and GT1 tet-R parasites do not express any proteins that are HA-epitope tagged (first  
257 panel). In the absence of ATc, Tet-R represses the expression of GRA16-HA (second panel) and  
258 GRA24-HA (fourth panel). Repression by Tet-R is relieved only in the presence of 2 $\mu$ M ATc (third  
259 and fifth panel) allowing for the proper localization of GRA16-HA and GRA24-HA to the parasite  
260 PVM and host cell nucleus (yellow arrows). Images are scaled to 10 $\mu$ m.

261

262 **Figure 1b. *In vitro* DBA positive cysts do not secrete GRA16-HA beyond the cyst wall**  
263 **membrane.** HFFs were infected with a single clone of GT1-tetR parasites that expressed GRA16-  
264 HA only in the presence of ATc. After 24 hours of infection, stage differentiation was induced as  
265 indicated in the text. After 5 days, 2  $\mu$ M ATc was added and 2 days later the coverslips were fixed  
266 with 100% cold methanol (also eliminates YFP signal from TetR) and processed for IFA. The cyst  
267 wall was stained with DBA-FITC along with HA and Hoechst. In the absence of ATc, GRA16-HA  
268 was not detected in parasites (first panel). GRA16-HA accumulated beneath the cyst wall only in the  
269 presence of ATc (second to fourth panels). Images are scaled to 10 $\mu$ m.

270 **Figure 2. GRA24-HA accumulates underneath the DBA positive cyst wall.** (a) Same IFA protocol  
271 was followed as described for figure 2. In the absence of ATc, there was no expression of GRA24-  
272 HA (first panel). In the presence of ATc, GRA24-HA accumulates beneath the cyst wall (second to  
273 fourth panel). (b) Multiple infected HFFs with tachyzoites and four *in vitro* cysts of parasites that  
274 express GRA24-HA showing nuclear localization. Yellow arrows indicate GRA24-HA expressing *in*  
275 *vitro* cysts. DBA-FITC staining is faint since 3% formaldehyde was used to fix parasites. Images are  
276 scaled to 50 $\mu$ m.

**Anti-HA**

**Anti-HA**  
**TetR-YFP**  
**Hoechst**

10  $\mu$ m

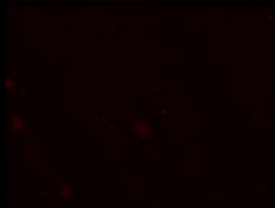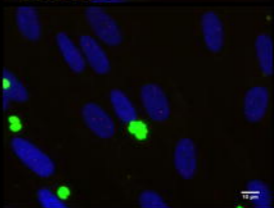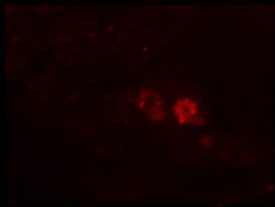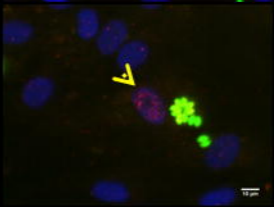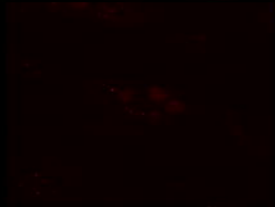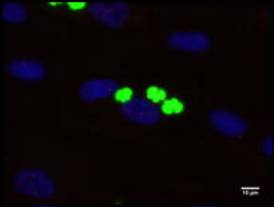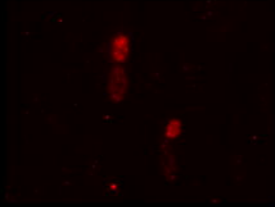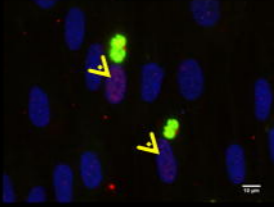



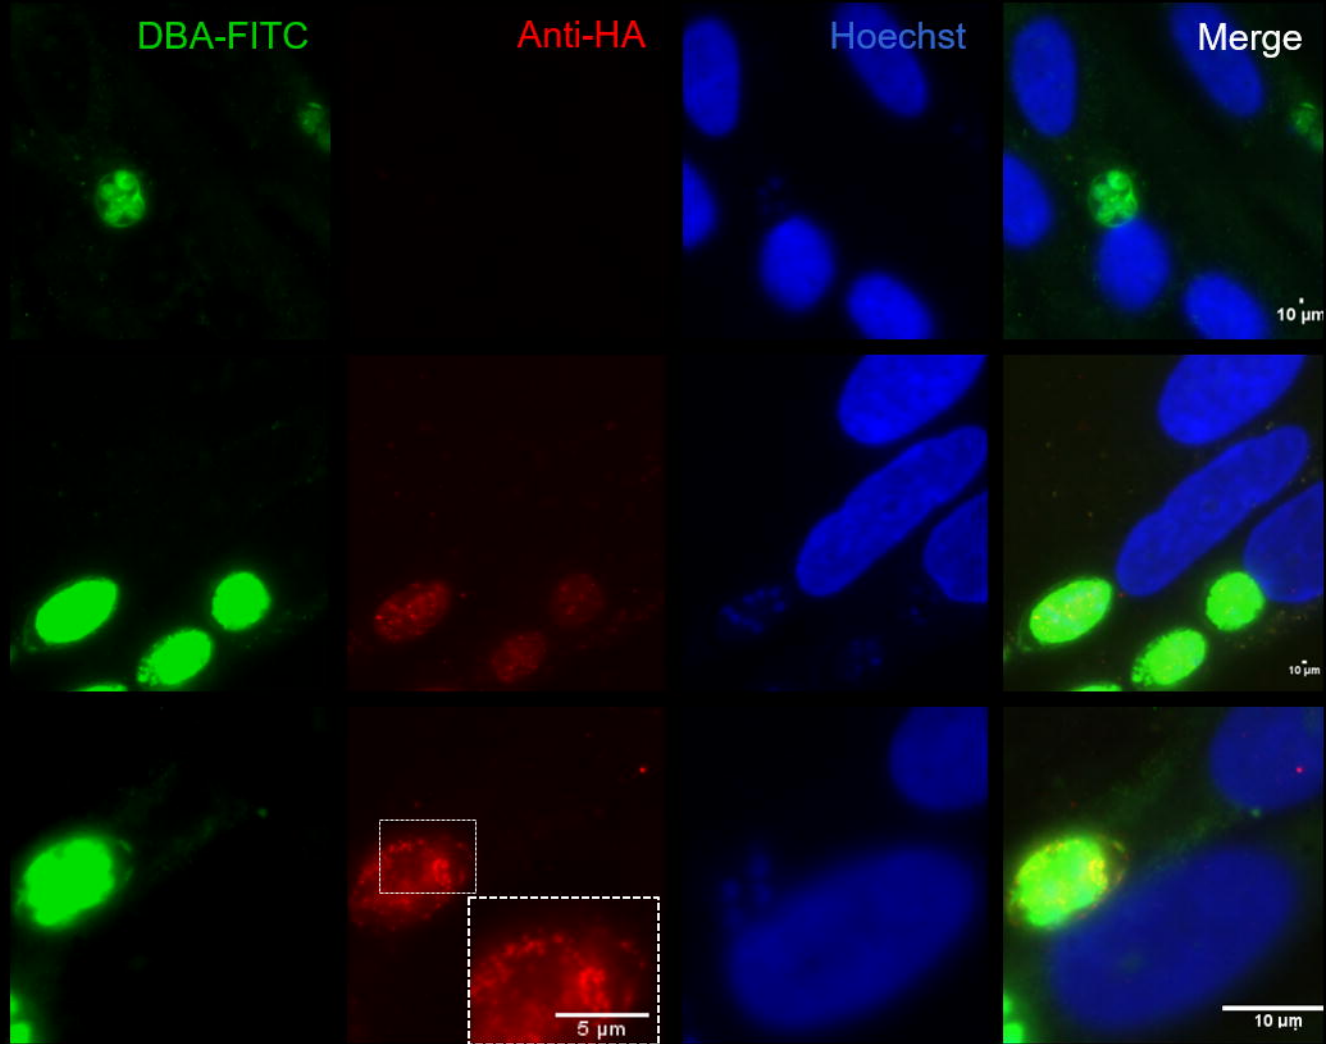

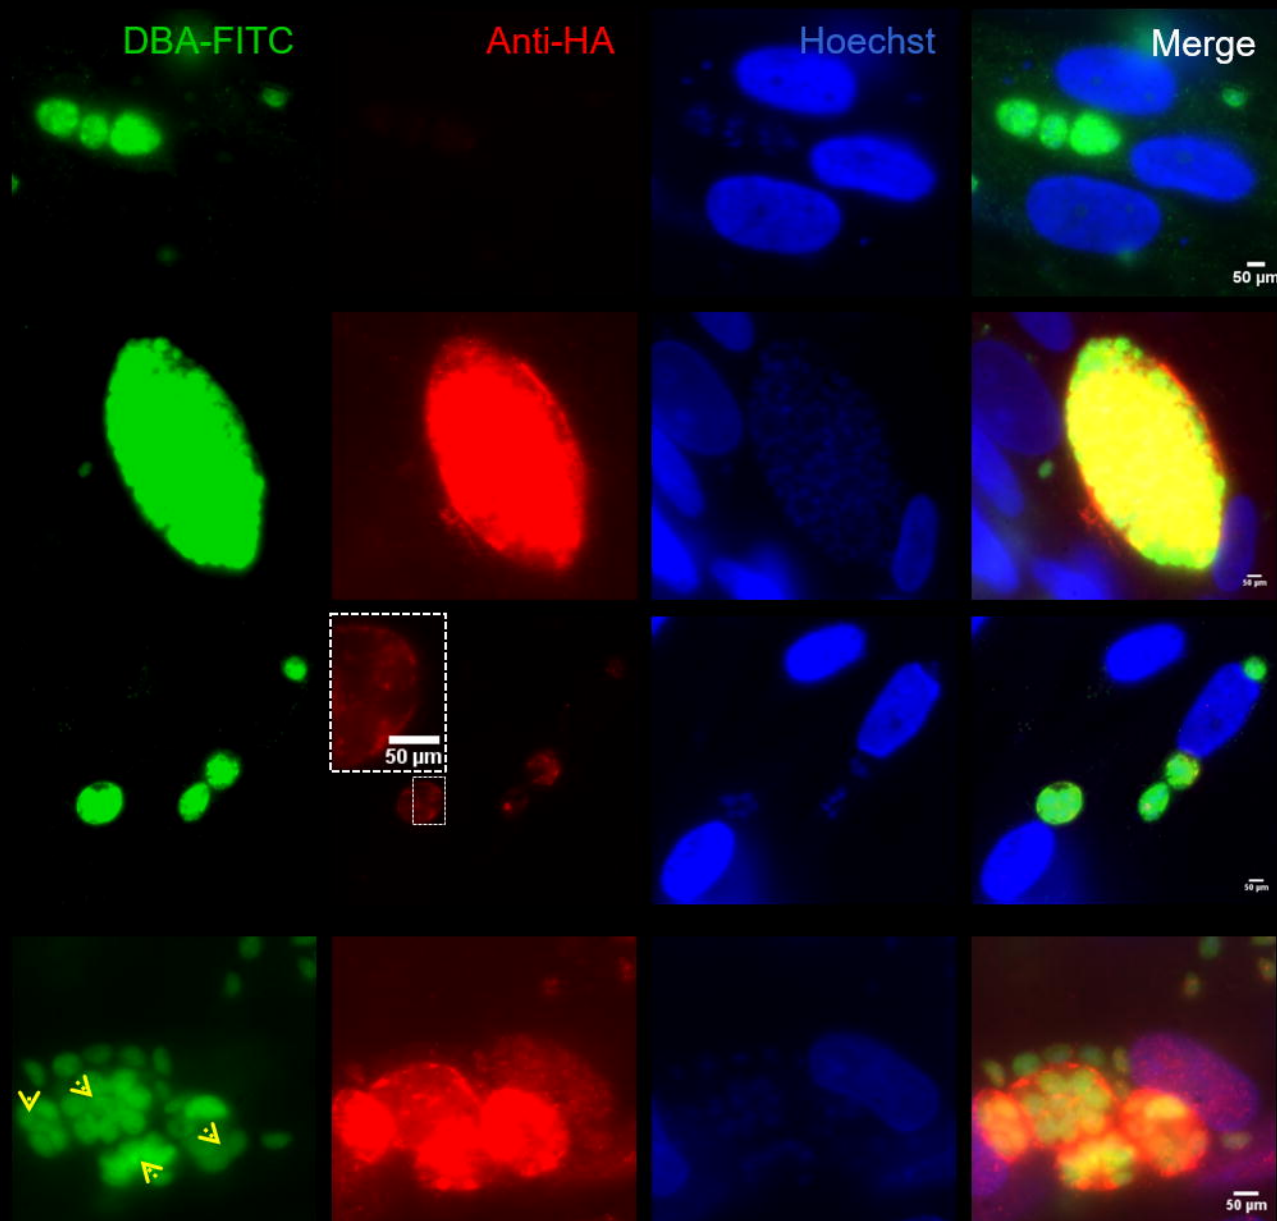

Source: http://biorxiv.org/content/10.1101/370502v1.full.pdf
